# Supplementary material
Source: HighWire-hosted journal article supplement (https://erj.ersjournals.com/highwire/filestream/113834/field_highwire_adjunct_files/0/erj-02205-2011-r1_supplement.pdf)
Supplement: erj-02205-2011-r1_supplement.pdf [file erj-02205-2011-r1_supplement.pdf]

## **Reduced lung function due to biomass smoke exposure in young adults in rural Nepal**

Om P Kurmi<sup>1</sup>, Graham S Devereux<sup>2</sup>, W Cairns S Smith<sup>2</sup>, Sean Semple<sup>2</sup>, Markus F C Steiner<sup>2</sup>, Padam Simkhada<sup>3</sup>, Kin-Bong Hubert Lam<sup>1</sup>, Jon G Ayres<sup>1</sup>

Online Data Supplement

## ONLINE DATA SUPPLEMENT

**Table S1:** Mean absolute values of lung function indices (95% CI) in lifelong non-smoking, biomass and non-biomass users, stratified by sex and age bands

| Age, years   | Mean FEV <sub>1</sub> , L (95% CI) |                               |         | Mean FVC, L (95% CI)          |                               |         | Mean FEF <sub>25-75</sub> , L/s (95% CI) |                               |         | Mean FEV <sub>1</sub> /FVC, % (95% CI) |                                  |         |
|--------------|------------------------------------|-------------------------------|---------|-------------------------------|-------------------------------|---------|------------------------------------------|-------------------------------|---------|----------------------------------------|----------------------------------|---------|
|              | Biomass                            | Non-biomass                   | p-value | Biomass                       | Non-biomass                   | p-value | Biomass                                  | Non-biomass                   | p-value | Biomass                                | Non-biomass                      | p-value |
| <b>Men</b>   |                                    |                               |         |                               |                               |         |                                          |                               |         |                                        |                                  |         |
| 16-25        | 3.06<br>(2.95, 3.17)<br>n=119      | 3.34<br>(3.24, 3.45)<br>n=96  | <0.001  | 3.71<br>(3.59, 3.83)<br>n=119 | 3.89<br>(3.77, 4.02)<br>n=96  | 0.037   | 3.24<br>(3.03, 3.45)<br>n=119            | 3.83<br>(3.60, 4.05)<br>n=96  | <0.001  | 82.64<br>(81.16, 84.11)<br>n=119       | 86.03<br>(84.81, 87.25)<br>n=96  | <0.001  |
| 26-35        | 2.90<br>(2.76, 3.03)<br>n=76       | 3.19<br>(3.06, 3.32)<br>n=87  | 0.002   | 3.66<br>(3.50, 3.81)<br>n=76  | 3.89<br>(3.74, 4.03)<br>n=87  | 0.031   | 2.78<br>(2.54, 3.01)<br>n=76             | 3.37<br>(3.12, 3.62)<br>n=87  | <0.001  | 79.31<br>(77.57, 81.04)<br>n=76        | 82.10<br>(80.72, 83.49)<br>n=87  | 0.012   |
| 36-45        | 2.70<br>(2.50, 2.90)<br>n=45       | 2.77<br>(2.64, 2.91)<br>n=58  | 0.531   | 3.56<br>(3.32, 3.80)<br>n=45  | 3.55<br>(3.39, 3.70)<br>n=58  | 0.911   | 2.45<br>(2.13, 2.77)<br>n=45             | 2.66<br>(2.38, 2.95)<br>n=58  | 0.327   | 75.92<br>(73.15, 78.69)<br>n=45        | 78.20<br>(76.24, 80.16)<br>n=58  | 0.167   |
| 46-55        | 2.10<br>(1.88, 2.32)<br>n=34       | 2.41<br>(2.20, 2.62)<br>n=47  | 0.044   | 3.00<br>(2.78, 3.21)<br>n=34  | 3.22<br>(3.01, 3.44)<br>n=47  | 0.152   | 1.49<br>(1.23, 1.75)<br>n=34             | 2.09<br>(1.76, 2.42)<br>n=47  | 0.008   | 68.90<br>(64.80, 72.99)<br>n=34        | 74.01<br>(70.77, 77.26)<br>n=47  | 0.048   |
| >55          | 1.68<br>(1.49, 1.86)<br>n=52       | 1.86<br>(1.68, 2.04)<br>n=42  | 0.172   | 2.57<br>(2.33, 2.81)<br>n=52  | 2.62<br>(2.44, 2.81)<br>n=42  | 0.734   | 1.07<br>(0.89, 1.26)<br>n=52             | 1.40<br>(1.14, 1.66)<br>n=42  | 0.038   | 64.54<br>(61.10, 67.98)<br>n=52        | 69.75<br>(66.00, 73.50)<br>n=42  | 0.042   |
| <b>Women</b> |                                    |                               |         |                               |                               |         |                                          |                               |         |                                        |                                  |         |
| 16-25        | 2.29<br>(2.21, 2.38)<br>n=134      | 2.43<br>(2.36, 2.50)<br>n=127 | 0.014   | 2.74<br>(2.65, 2.83)<br>n=134 | 2.80<br>(2.73, 2.88)<br>n=127 | 0.305   | 2.65<br>(2.48, 2.81)<br>n=134            | 3.01<br>(2.85, 3.18)<br>n=127 | 0.002   | 83.84<br>(82.47, 85.21)<br>n=134       | 86.75<br>(85.62, 87.87)<br>n=127 | 0.001   |
| 26-35        | 2.10<br>(2.01, 2.20)<br>n=83       | 2.33<br>(2.24, 2.41)<br>n=91  | <0.001  | 2.70<br>(2.58, 2.82)<br>n=83  | 2.85<br>(2.75, 2.96)<br>n=91  | 0.048   | 1.99<br>(1.83, 2.16)<br>n=83             | 2.58<br>(2.38, 2.77)<br>n=91  | <0.001  | 78.14<br>(76.36, 79.92)<br>n=83        | 81.72<br>(80.37, 83.07)<br>n=91  | 0.001   |
| 36-45        | 1.75<br>(1.66, 1.85)<br>n=70       | 2.01<br>(1.91, 2.10)<br>n=57  | <0.001  | 2.36<br>(2.24, 2.48)<br>n=70  | 2.51<br>(2.40, 2.63)<br>n=57  | 0.075   | 1.46<br>(1.66, 1.85)<br>n=70             | 2.14<br>(1.93, 2.34)<br>n=57  | <0.001  | 74.42<br>(72.20, 76.63)<br>n=70        | 80.16<br>(78.36, 81.97)<br>n=57  | <0.001  |
| 46-55        | 1.48<br>(1.30, 1.65)<br>n=28       | 1.63<br>(1.52, 1.74)<br>n=54  | 0.117   | 2.04<br>(1.86, 2.23)<br>n=28  | 2.15<br>(2.03, 2.28)<br>n=54  | 0.316   | 1.15<br>(0.90, 1.40)<br>n=28             | 1.47<br>(1.27, 1.67)<br>n=54  | 0.050   | 71.90<br>(67.74, 76.05)<br>n=28        | 74.42<br>(72.99, 77.84)<br>n=54  | 0.117   |
| >55          | 1.12<br>(0.99, 1.25)<br>n=54       | 1.33<br>(1.17, 1.48)<br>n=38  | 0.047   | 1.66<br>(1.48, 1.83)<br>n=54  | 1.85<br>(1.68, 2.01)<br>n=38  | 0.126   | 0.83<br>(0.65, 1.02)<br>n=54             | 1.14<br>(0.88, 1.40)<br>n=38  | 0.045   | 67.39<br>(63.31, 71.47)<br>n=54        | 71.47<br>(66.47, 76.47)<br>n=38  | 0.203   |

**Table S2** Prevalence of airflow obstruction in biomass and non-biomass using Nepalese adults according to different definitions

|       | Biomass |                                               | Non-biomass |                | p-value |
|-------|---------|-----------------------------------------------|-------------|----------------|---------|
|       | n       | n (%) with AFO                                | n           | n (%) with AFO |         |
|       |         | FEV <sub>1</sub> /FVC < lower limit of normal |             |                |         |
| Men   | 326     | 24 (7.4)                                      | 330         | 11 (3.3)       | 0.022   |
| Women | 369     | 40 (10.8)                                     | 367         | 14 (3.8)       | <0.001  |
| All   | 695     | 64 (8.1)                                      | 697         | 25 (3.6)       | <0.001  |
|       |         | FEV <sub>1</sub> /FVC < 70%                   |             |                |         |
| Men   | 326     | 69 (21.2)                                     | 330         | 41 (12.4)      | 0.003   |
| Women | 369     | 70 (19.0)                                     | 367         | 35 (9.5)       | <0.001  |
| All   | 695     | 139 (20.0)                                    | 697         | 76 (10.9)      | <0.001  |

AFO: airflow obstruction

**Table S3** Effect of interaction between exposure to biomass smoke and smoking status on lung function indices

|                                | FEV <sub>1</sub>       | FVC                                  | FEF <sub>25-75</sub>  | AFO                     |
|--------------------------------|------------------------|--------------------------------------|-----------------------|-------------------------|
|                                | Men                    |                                      |                       |                         |
| Ever smoker and biomass use    |                        |                                      |                       |                         |
| RERI (95% CI)                  | 0.129 (-0.026, 0.284)  | 0.116 (-0.076, 0.309)                | 0.251 (0.029, 0.473)  | -2.574 (-9.976, 4.827)  |
| AP (95% CI)                    | 0.150 (-0.027, 0.328)  | 0.114 (-0.070, 0.299)                | 0.425 (0.046, 0.804)  | -0.539 (-2.027, 0.950)  |
| S (95% CI)                     | 0.524 (0.240, 1.144)   | -0.185 (N/A*)                        | 0.620 (0.422, 0.912)  | 0.595 (0.184, 1.926)    |
| Ex-smoker and biomass use      |                        |                                      |                       |                         |
| RERI (95% CI)                  | 0.076 (-0.146, 0.299)  | 0.009 (-0.243, 0.261)                | 0.188 (-0.182, 0.558) | -0.444 (-6.267, 5.379)  |
| AP (95% CI)                    | 0.098 (-0.175, 0.371)  | 0.011 (-0.304, 0.326)                | 0.286 (-0.215, 0.787) | -0.102 (-1.519, 1.314)  |
| S (95% CI)                     | 0.745 (0.308, 1.804)   | 0.958 (0.285, 3.226)                 | 0.645 (0.261, 1.595)  | 0.883 (0.169, 4.613)    |
| Current smoker and biomass use |                        |                                      |                       |                         |
| RERI (95% CI)                  | 0.085 (-0.104, 0.274)  | 0.058 (-0.179, 0.295)                | 0.235 (-0.479, 0.948) | -0.885 (-3.644, 1.874)  |
| AP (95% CI)                    | 0.093 (-0.111, 0.296)  | 0.053 (-0.161, 0.267)                | 0.372 (-0.757, 1.501) | -0.551 (-2.308, 1.207)  |
| S (95% CI)                     | 0.502 (0.112, 2.260)   | 2.601 (0.005, 1408.769)              | 0.612 (0.183, 2.045)  | 0.407 (0.033, 4.959)    |
|                                | Women                  |                                      |                       |                         |
| Ever smoker and biomass use    |                        |                                      |                       |                         |
| RERI (95% CI)                  | 0.042 (-0.115, 0.200)  | -0.001 (-0.209, 0.207)               | 0.081 (-0.194, 0.356) | -2.695 (-8.567, 3.176)  |
| AP (95% CI)                    | 0.049 (-0.132, 0.231)  | -0.001 (-0.209, 0.208)               | 0.135 (-0.322, 0.591) | -0.602 (-1.997, 0.793)  |
| S (95% CI)                     | 0.763 (0.305, 1.910)   | 1.847 (0.00, 3.1×10 <sup>109</sup> ) | 0.831 (0.466, 1.483)  | 0.563 (0.194, 1.635)    |
| Ex-smoker and biomass use      |                        |                                      |                       |                         |
| RERI (95% CI)                  | 0.127 (-0.082, 0.336)  | 0.077 (-0.181, 0.335)                | 0.172 (-0.222, 0.565) | -1.669 (-5.666, 2.328)  |
| AP (95% CI)                    | 0.136 (-0.081, 0.353)  | 0.077 (-0.176, 0.331)                | 0.230 (-0.279, 0.739) | -0.671 (-2.552, 1.209)  |
| S (95% CI)                     | 0.342 (0.045, 2.586)   | 0.051 (0.00, 5.74×10 <sup>15</sup> ) | 0.597 (0.200, 1.776)  | 0.471 (0.083, 2.677)    |
| Current smoker and biomass use |                        |                                      |                       |                         |
| RERI (95% CI)                  | -0.027 (-0.267, 0.213) | -0.144 (-0.479, 0.192)               | 0.053 (-0.353, 0.458) | -4.102 (-13.630, 5.426) |
| AP (95% CI)                    | -0.032 (-0.317, 0.253) | -0.146 (-0.489, 0.198)               | 0.091 (-0.614, 0.797) | -1.040 (-3.606, 1.525)  |
| S (95% CI)                     | 1.212 (0.187, 7.872)   | -0.101 (N/A*)                        | 0.890 (0.380, 2.087)  | 0.418 (0.092, 1.906)    |

AFO: airflow obstruction; RERI: Relative excess risk due to interaction; AP: Attributable proportion due to interaction; S: Synergy index

\* 95% CI could not be calculated



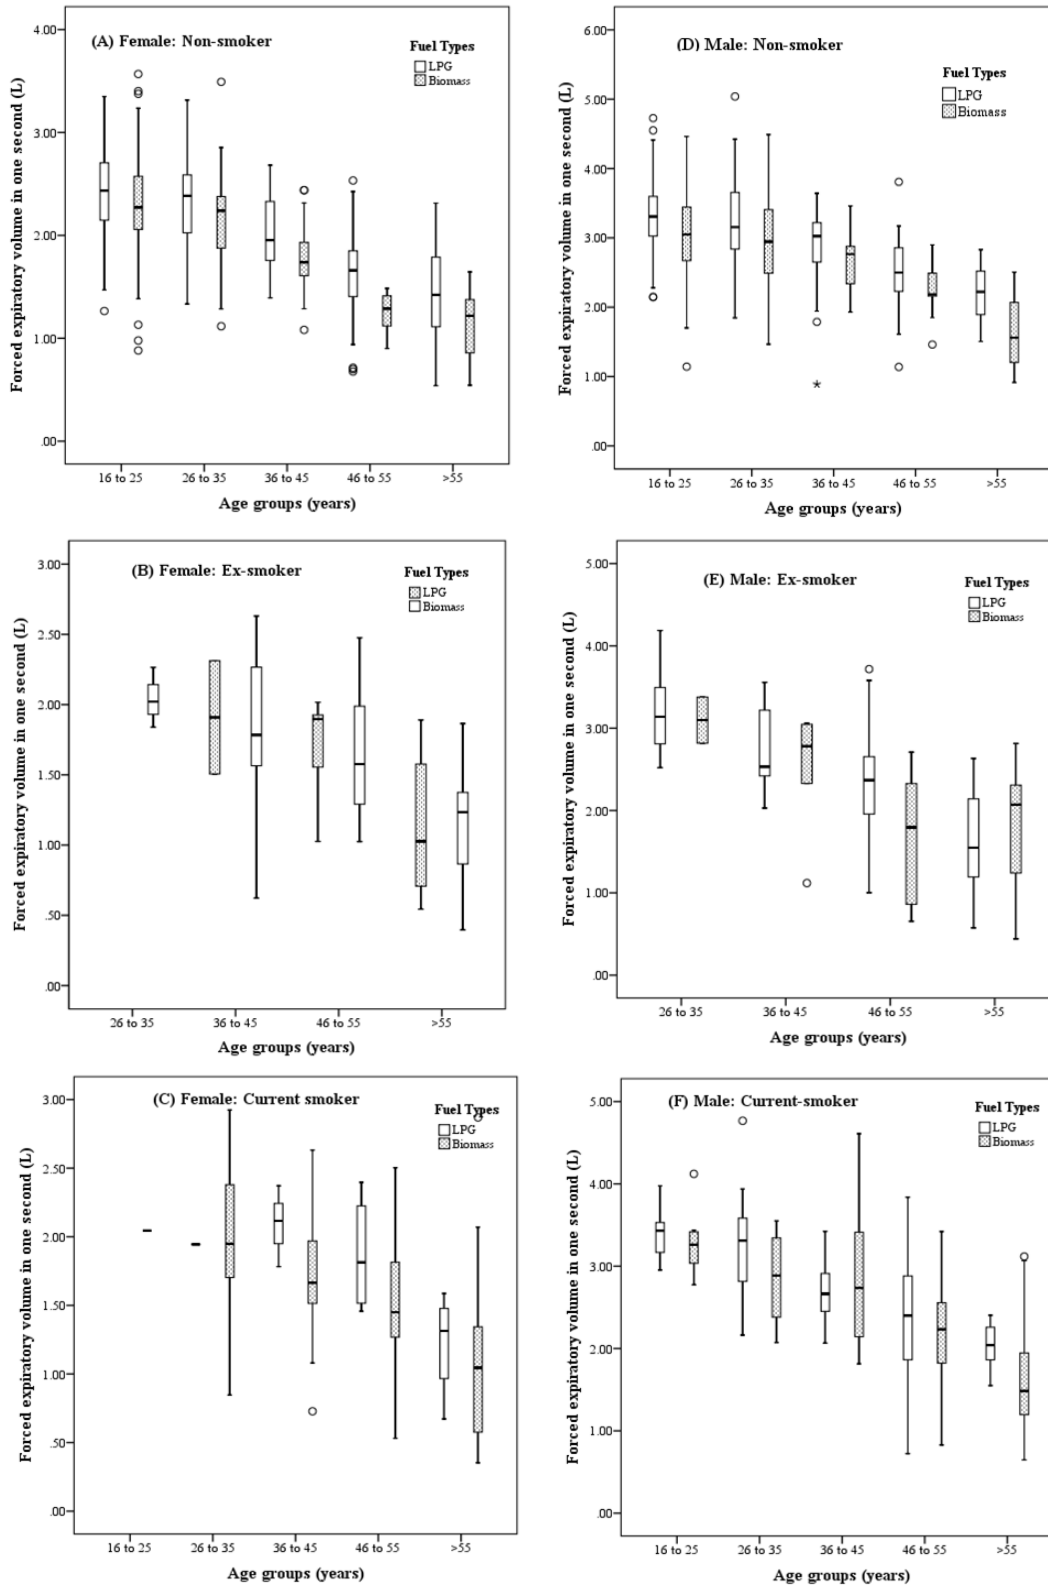

**FIGURE S1:** BOX PLOTS SHOWING FORCED EXPIRATORY VOLUME IN ONE SECOND WITH DIFFERENT AGE GROUPS CLUSTERED FOR FUEL TYPES (LPG “LIQUEFIED PETROLEUM GAS” AND BIOMASS). THE TWO COLUMNS SHOW BOX PLOTS FOR FEMALE AND MALE WHEREAS THE THREE ROWS SHOW BOX PLOT FOR NON-SMOKER, EX-SMOKER AND CURRENT SMOKER.
